# Supplementary material
Source: HighWire-hosted journal article supplement (https://adc.bmj.com/content/103/2/155)
Supplement: inline-supplementary-material-3 [file inline-supplementary-material-3.pdf]

Web Figure 1: Sensitivity analysis of the incremental net monetary benefit assuming costs and QALYs are not missing at random, imputed missing costs are reduced by 10 to 50 percent and imputed missing QALYs are increased by 10 to 50 percent

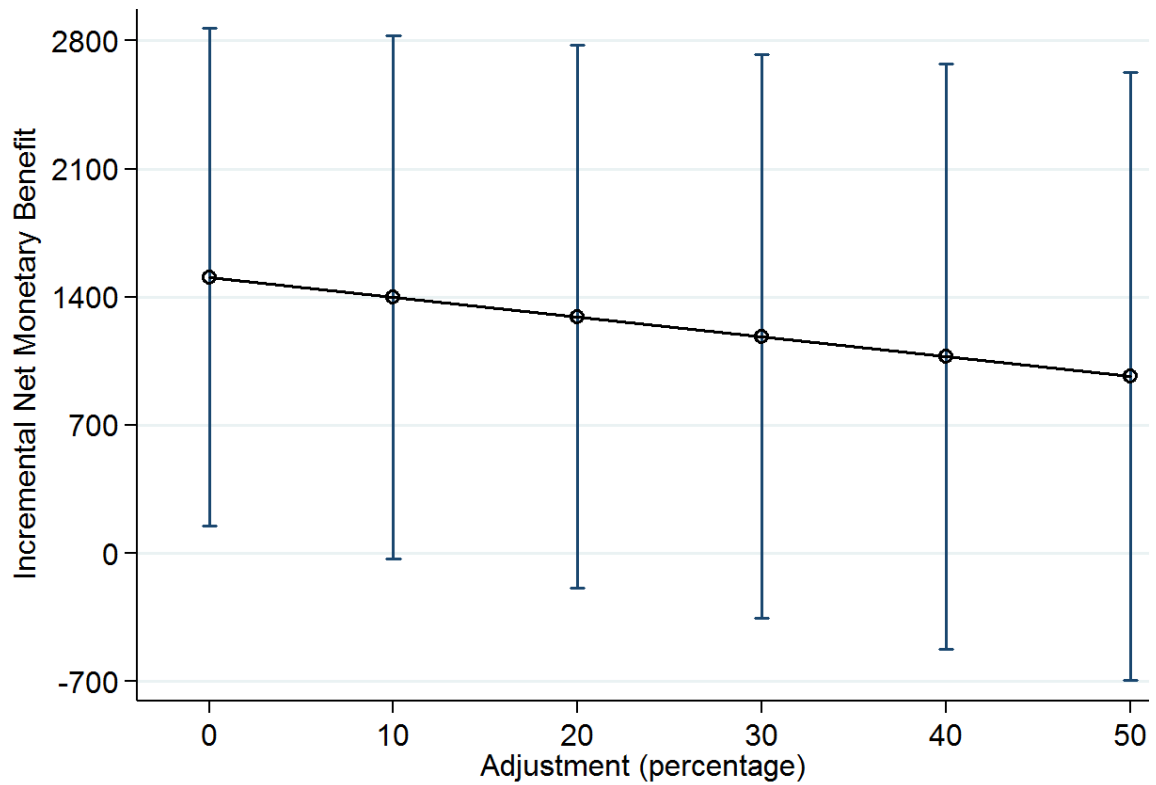

Error bars are 95% Confidence Intervals estimated using 1000 bootstrap replicates.
